# Supplementary material for: Multidimensional Investigation of Bullying in Primary School Children: Psychological, Socioeconomic and Cultural Perspectives
Source: Research Square preprint supplement (doi:10.21203/rs.3.rs-6785420/v1), 2025-09-12
Supplement: Supplementary file 1 [file 4e6f3cc64897efce699259d0.pdf]

## PERSONAL INFORMATION FORM (TEACHER)

Dear teacher,

The aim of this research is to address the phenomenon of bullying in primary school children with a multidimensional approach. Within the scope of the research, the psychological profiles of aggressor and victim children, the effects of bullying on mental health and development, and the role of cultural, socioeconomic and demographic factors on bullying will be examined. In addition, it is aimed to provide strategic suggestions for combating bullying by comparing teachers' classroom observations and children's individual experiences.

The data in the study will only be used within the scope of scientific research, your personal information will not be included. If you have any questions, you can contact me via e-mail at [ebru.boga@dicle.edu.tr](mailto:ebru.boga@dicle.edu.tr). Voluntary participation in the study is essential, you have the right to leave the study at any time. Thank you for your sincere responses and contribution.

Kind regards

Dr Ebru BOĞA BARAN

|                                                                                                              |                                                                                                                                                               |                                                                                                                              |
|--------------------------------------------------------------------------------------------------------------|---------------------------------------------------------------------------------------------------------------------------------------------------------------|------------------------------------------------------------------------------------------------------------------------------|
| <b>Gender:</b><br>Female ( )    Male ( )                                                                     | <b>Your age:</b><br>20- 30 ( )    31-40 ( )<br>41-50 ( )    51 and over ( )                                                                                   | <b>How many years have you been teaching?</b><br>0-5 years ( )    6-10 years ( )<br>11-15 years ( )<br>16 years and over ( ) |
| <b>At which grade level do you work?</b><br>1st grade ( )    2nd grade ( )<br>3rd grade ( )    4th grade ( ) | <b>Your observations about the general socioeconomic status of your students:</b><br>Low income level ( )<br>Middle income level ( )<br>High income level ( ) | <b>The student population of the school you work in:</b><br>Less than 100 ( )<br>100-300 ( )<br>300 and above ( )            |
| <b>Additional Information</b>                                                                                |                                                                                                                                                               |                                                                                                                              |
| <b>Have you encountered bullying incidents in your class before?</b><br>Yes ( ) No ( )                       | <b>Have you received any training on bullying?</b><br>Yes ( ) No ( )                                                                                          | <i>Please write if there is any other information you would like to add:</i>                                                 |

## **SEMI-STRUCTURED INTERVIEW FORM (TEACHER)**

### **1. General Classroom Atmosphere**

- How are the social relations in your class? How do students usually communicate with each other?
- When you observe cases of bullying among students, how do they usually manifest themselves (physical, verbal, social exclusion, etc.)?

### **2. Symptoms of Bullying**

- What behaviours or characteristics do you notice in bullying students?
- What are the obvious reactions of victimised students after bullying?

### **3. Impacts on Mental Health and Development**

#### **For Bullied Students:**

- Do you notice emotional or behavioural changes in bullied students? Can you give examples?
- How are such students' attendance or academic achievement affected?

- What are your observations about the general psychological state of students who are bullied?

#### **For Bullying Students:**

- Do you observe any distinctive features in the emotional state or behaviour of students who exhibit aggressive behaviour?
- What can you say about the social relationships and emotional reactions of these students in the classroom?

#### **Long-term effects of bullying:**

- Have you observed the long-term effects (e.g., after a few months or years) of bullying experiences? Can you give an example?

### **4. Sample Questions for Sociodemographic Determinants**

#### **Family and Economic Status:**

- Do you have any observations about the family structure or economic situation of the students involved in bullying? What are the effects of this situation on bullying?
- How do family attitudes (e.g. disciplinary methods or supportive behaviours) affect bullying behaviours?

**Cultural Factors:**

- Have you observed a difference in the occurrence of bullying behaviours among students from different cultural backgrounds?
- Do you think that cultural values influence students' perceptions or reactions to bullying?

**Gender and Age Factors:**

- Do you observe gender differences in bullying behaviour? For example, are there differences in the forms or frequency of bullying between male and female students?
- Do you think that bullying behaviours or effects vary between age groups?

**5. Intervention Methods**

- What do you do first when you encounter bullying? What steps do you usually follow?
- Do you have a school policy or guidance strategy in place?

## **6. Solutions and Suggestions**

- Is there a creative method you use in the classroom to prevent or reduce bullying?
- What support do you need to be more effective in this regard (training, resources, parent cooperation, etc.)?

**If there is any other information you would like to add, please write.**

## **PERSONAL INFORMATION FORM (CHILD)**

Hello. The questions on this form have been prepared to suit you. Please tick the box that you think is correct or write your answers. Your answers will only be used for research and will be kept confidential. Thank you for sharing your thoughts and experiences.

Sincerely

Dr Ebru BOĞA BARAN

### **Personal Information**

#### **Gender:**

☐ Girl

☐ Boy

#### **How old are you?**

☐ 6

☐ 7

☐ 8

☐ 9

☐ 10

☐ 11

#### **Which grade do you attend?**

☐ 1st grade

☐ 2nd grade

☐ 3rd grade

☐ 4th grade

### **Family Information**

#### **Can you tell me how many people are in your family?**

☐ 3 people

☐ 4 people

☐ 5 people

☐ More

**What do you think about your family's financial situation?**

- ☐ We have everything, we can easily meet our needs.
- ☐ Some things can be bought, but not always.
- ☐ Sometimes the things I want to buy cannot be bought.

**School and Friendship Information**

**How many friends do you have at school?**

- ☐ A lot
- ☐ A few
- ☐ Not many

**Have you experienced bullying at school?**

- ☐ Yes
- ☐ No

**Who do you turn to in case of bullying?**

- ☐ My teacher
- ☐ My parents
- ☐ My friends
- ☐ I don't tell anyone

**Additional Information**

Is there anything you think should be better at school or in the classroom?

## **SEMI-STRUCTURED INTERVIEW FORM (CHILD)**

### **1. Personal Dimensions of Bullying Experiences**

- Have you ever been treated badly by a friend? How did you feel?
- What do you prefer to do in such a situation?

### **2. Emotional and Social Effects**

- Do your relationships with your other friends change when you experience such an event? How do you get on with your other friends in such a situation?
- How did this affect you at school or at home?

### **3. Observations and Ways of Problem Solving**

- What do you do when you see a friend mistreating someone else?
- What do you think can be done to prevent such a situation



#### **4. Friendship and Communication Dynamics**

- How do your friends usually treat each other in class?
- Why do you think some friends behave badly?

#### **5. Dreams and Solutions**

- What would a classroom look like where everyone is happy?
- How can you help a friend who is being bullied?

**If there is any other information you would like to add, please write.**
